# Supplementary material for: Complete chloroplast genome sequence of Pachystachys lutea Nees: genome structure, adaptive evolution, and phylogenetic relationships
Source: BMC Genom Data. 2025 Nov 19;26:87. doi: 10.1186/s12863-025-01380-9 (PMC12628888; doi:10.1186/s12863-025-01380-9)
Supplement: Supplementary file 7 — Supplementary Material 7: Table S1. The SSR loci distribution of the chloroplast genome in P. lutea [file 12863_2025_1380_MOESM7_ESM.xlsx]

## Sheet: Sheet1
Table S1. The SSR loci distribution of the chloroplast genome in P. lutea.
SSR Type	SSR Repeat Base	start	end	Region
p1	(A)12	6114	6125	LSC
c	(A)10tataaaaaaaatatataatataaaaaaatatataatatataaat(TA)6	7267	7332	LSC
p1	(T)13	7487	7499	LSC
p1	(A)13	7713	7725	LSC
p2	(AT)7	7956	7969	LSC
p1	(A)16	9505	9520	LSC
p1	(T)16	9676	9691	LSC
p1	(A)11	11888	11898	LSC
c	(C)11ttatcag(A)13	15830	15860	LSC
p1	(T)10	29589	29598	LSC
p2	(AT)8	30949	30964	LSC
p1	(A)10	32026	32035	LSC
c	(T)11(G)11	35949	35970	LSC
c	(C)12(A)13	36284	36308	LSC
p1	(T)10	42068	42077	LSC
p2	(TA)6	46063	46074	LSC
c	(AT)6ggggtatatatcaacccatattgaattgccgatacagaaatgataaaatccaatttgattggatcaaaaaggaaaatac(T)10	46730	46830	LSC
p1	(T)10	48066	48075	LSC
p1	(T)13	50569	50581	LSC
p1	(T)10	54135	54144	LSC
c	(C)13(A)11	56929	56952	LSC
p1	(T)15	59347	59361	LSC
p1	(A)10	60292	60301	LSC
p1	(A)14	68570	68583	LSC
p1	(T)12	68876	68887	LSC
p1	(T)10	69932	69941	LSC
p1	(T)16	74864	74879	LSC
p2	(AT)6	75610	75621	LSC
p1	(T)12	77371	77382	LSC
p1	(T)13	81319	81331	LSC
p1	(T)12	107170	107181	IRB
p1	(A)12	111777	111788	SSC
p1	(T)10	111905	111914	SSC
p1	(A)10	118957	118966	SSC
p1	(T)11	123642	123652	SSC
c	(T)10aatttttcc(T)10	124222	124250	SSC
p1	(T)12	124360	124371	SSC
p1	(T)12	124748	124759	SSC
p3	(TCT)8	125147	125170	SSC
p1	(A)12	127742	127753	IRA
