# Supplementary material for: Complete chloroplast genome sequence of Pachystachys lutea Nees: genome structure, adaptive evolution, and phylogenetic relationships
Source: BMC Genom Data. 2025 Nov 19;26:87. doi: 10.1186/s12863-025-01380-9 (PMC12628888; doi:10.1186/s12863-025-01380-9)
Supplement: Supplementary file 8 — Supplementary Material 8: Table S2. RSCU analysis of each amino acid in P. lutea [file 12863_2025_1380_MOESM8_ESM.xlsx]

## Sheet: Sheet1
Table S2. RSCU analysis of each amino acid in P. lutea.
Amino acid	Codon	Number	RSCU	Amino acid	Codon	Number	RSCU
Phe	TTT	907	1.44	His	CAT	450	1.44
	TTC	497	0.56		CAC	136	0.45
Leu	TTA	791	2.06	Gln	CAA	669	1.58
	TTG	545	1.21		CAG	211	0.42
	CTT	561	1.2	Ala	GCT	574	1.74
	CTC	172	0.3		GCC	222	0.72
	CTA	376	0.85		GCA	372	1.12
	CTG	184	0.37		GCG	150	0.42
Ile	ATT	1021	1.54	TER	TAA	27	1.4
	ATC	444	0.59		TAG	17	0.88
	ATA	589	0.87		TGA	14	0.72
Met	ATG	558	1	Trp	TGG	439	0.88
Val	GTT	489	1.51	Asn	AAT	908	1.5
	GTC	151	0.42		AAC	280	0.5
	GTA	473	1.46	Lys	AAA	961	1.55
	GTG	189	0.61		AAG	340	0.45
Ser	TCT	531	1.62	Arg	CGT	319	1.66
	TCC	305	1.01		CGC	101	0.37
	TCA	368	1.14		CGA	341	1.46
	TCG	229	0.59		CGG	116	0.38
	AGT	388	1.33		AGA	464	1.6
	AGC	100	0.32		AGG	174	0.53
Pro	CCT	395	1.45	Asp	GAT	809	1.58
	CCC	211	0.75		GAC	191	0.42
	CCA	278	1.14	Glu	GAA	952	1.55
	CCG	154	0.52		GAG	334	0.45
Thr	ACT	497	1.52	Gly	GGT	523	1.33
	ACC	228	0.87		GGC	161	0.37
	ACA	369	1.16		GGA	657	1.61
	ACG	146	0.45		GGG	313	0.69
Tyr	TAT	716	1.61	Cys	TGT	210	1.54
	TAC	171	0.32		TGC	69	0.33
Total						24537
